# Supplementary material for: A BODIPY-based two-photon fluorescent probe validates tyrosinase activity in live cells
Source: Royal Society of Chemistry journal article supplement (doi:10.1039/c7cc05043g), 2017-01-01
Supplement: c7cc05043g1.pdf [file c7cc05043g1.pdf]

## Supplementary Information

*For*

### **BODIPY based Two-Photon Fluorescent Probe Validates Tyrosinase Activity in Live- Cells**

Kondapa Naidu Bobba,<sup>‡,a</sup> Miae Won,<sup>‡,b</sup> Inseob Shim,<sup>‡,b</sup> Nithya Valusamy,<sup>a</sup> Zhiang Yang,<sup>c</sup> Junle Qu,<sup>\*,c</sup> Jong Seung Kim<sup>\*,b,c</sup> and Sankarprasad Bhuniya<sup>\*,a,d</sup>

<sup>a</sup>Amrita Centre for Industrial Research & Innovation, Amrita School of Engineering, Amrita Vishwa Vidyapeetham, Ettimadai, Coimbatore 641112, India.

<sup>b</sup>Department of Chemistry, Korea University, Seoul 02841, Korea.

<sup>c</sup>Key Laboratory of Optoelectronic Devices and Systems of Ministry of Education and Guangdong Province, College of Optoelectronic Engineering, Shenzhen University, Shenzhen 518060, China.

<sup>d</sup>Department of Chemical Engineering & Materials Science, Amrita School of Engineering, Coimbatore, Amrita Vishwa Vidyapeetham, Amrita University, India 641112.

\*Corresponding authors: jlqu@szu.edu.cn (JQ); b\_sankarprasad@cb.amrita.edu (SB); jongskim@korea.ac.kr (JSK)

‡These authors contributed equally to this work.

## Materials, methods and instrumentations

Pyrrole(Aldrich), triphosgene (TCI), dopamine.HCl(Aldrich), POCl<sub>3</sub>(Avra), boron trifluoride diethyl etherate(Aldrich), tyrosinase from mushroom (Aldrich),  $\alpha$ -MSH (Aldrich), 1, 2-dichloroethane (Avra), diethyl ether (Loba chem., India), pet ether 60-80 (Avra), ethyl acetate (Avra) and DCM (Avra) were purchased commercially and used without further purification. Flash column chromatography was performed using Silica gel (100-200 mesh) and analytical thin layer chromatography was performed using silica gel 60 (pre-coated sheets with 0.25 mm thickness). Mass spectra were recorded on anion SpecHiResESI mass spectrometer. NMR spectra were collected on a 400MHz spectrometer (Bruker, Germany).

## Reaction Scheme:

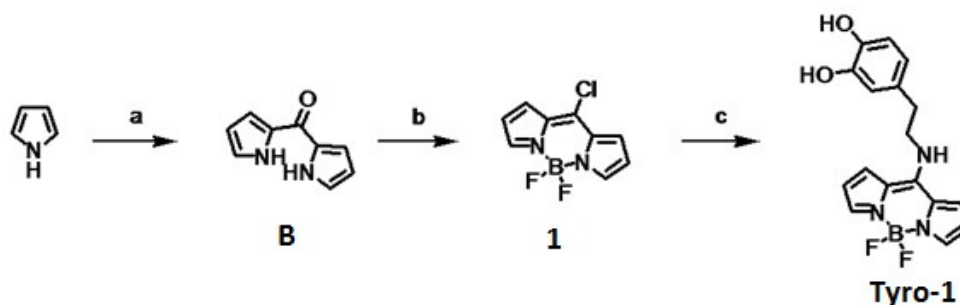

Synthesis of **Tyro-1**, a) (i) Pyrrole, triphosgene, 1,2-dichloroethane, 0°C, 2 h; (ii) Pyrrole, 80°C, 30 min; b) (i) POCl<sub>3</sub>, 1,2-dichloroethane, 80°C, 2 h. (ii) Et<sub>3</sub>N, BF<sub>3</sub>·Et<sub>2</sub>O; c) Dopamine. HCl, Et<sub>3</sub>N, Dichloromethane, 25°C, 6 h.

## Synthesis of B and 1

Both **B** and **1** were synthesized according to reported literature.<sup>1</sup>

## Synthesis of Tyro-1

Compound **1** (150 mg, 0.664 mmol) was added to a stirred solution of dopamine. HCl (377 mg, 1.99 mmol) and triethylamine (0.28 mL, 1.99 mmol) in DCM (20 mL) at 0°C and stirred for 6 h at room temperature. The reaction was monitored by TLC. After completion of reaction, the reaction mixture was poured into water (50 mL) and extracted with ethyl acetate (3 × 25 mL). The organic layer was washed with water (2 × 50 mL), brine (1 × 50 mL), dried over anhydrous sodium sulfate and concentrated under reduced pressure. The crude product was purified by column chromatography on

silica gel (100-200 mesh) using ethyl acetate in pet ether DCM (5:5) as eluent to obtain **1** as pale brown solid (90 mg; 64.47%). <sup>1</sup>H-NMR (400 MHz, DMSO-d<sub>6</sub>): δ 9.70 (s, 1H); 8.89 (s, 1H); 8.76 (s, 1H); 7.58 (s, 1H); 7.45 (d, *J* = 3.60 Hz, 1H); 7.35 (s, 1H); 7.32 (d, *J* = 4.0 Hz, 2H); 6.69 (q, 2H); 6.57 (q, 2H); 6.38 (q, 1H); 3.92 (t, *J* = 7.20 Hz, 2H); 2.95 (q, 2H); <sup>13</sup>C-NMR (100 MHz, DMSO-d<sub>6</sub>): 149.41, 145.99, 144.01, 134.21, 131.82, 130.21, 124.41, 122.45, 120.01, 117.65, 114.75, 112.89, 47.12, 32.75; ESI- HRMS *m/z* (M+H): calcd. 344. 13, found 344.1375.

### General methods for UV-Vis and Fluorescence Spectroscopy

All reagents and solvents used for fluorescence spectroscopy were commercial and used without further purification.

Except under special case, the following methods provide all of measurements for fluorescence spectroscopy. Absorption spectra were recorded on an UV-1800 spectrophotometer (Shimadzu), and fluorescence spectra were recorded using an RF-5301 fluorescence spectrofluorometer (Shimadzu) with a 300 μL volume of 1 cm standard quartz cell. 500 μM Stock solution of the probe was prepared by dissolving probe in DMSO. 100 U/mL Stock solution of the tyrosinase was prepared by dissolving in PBS buffer (pH=7.4). In an eppendorf tube, 3 μL of 500 μM **Tyro-1** and an appropriate volume of tyrosinase or other reagents and PBS buffer solution was mixed. The final 300 μL volume of reaction solution was incubated at 37°C. After then, it was transferred to the quartz cell for measure fluorescence. The fluorescence emission spectra were recorded at excitation wavelength of 400 nm and emission was monitored over wavelength the range of 400-600 nm ( $\lambda_{em} = 452$  nm) with slit width set at 3/5 nm. The solutions of biologically relevant species were prepared from ascorbic acid, GSH, NaNO<sub>2</sub>, chloride salts of Ag<sup>+</sup>, Al<sup>3+</sup>, Ba<sup>2+</sup>, Ca<sup>2+</sup>, Cd<sup>2+</sup>, Co<sup>2+</sup>, Cu<sup>2+</sup>, Fe<sup>2+</sup>, Fe<sup>3+</sup>, K<sup>+</sup>, Mg<sup>2+</sup>, Mn<sup>2+</sup>, Ni<sup>2+</sup>, Pb<sup>2+</sup>, Zn<sup>2+</sup> and amino acids (alanine, arginine, asparagine, aspartic acid, cysteine; f) glutamine; g) glutamic acid; h) glycine; i) histidine; j) homocysteine; k) isoleucine; l) leucine; m) lysine; n) methionine; o) phenylalanine, proline, serine, threonine, tryptophan, tyrosine and valine) in distilled water. The preparation or generation of ROS were prepared referring to the literature.<sup>2</sup>

## **Cell culture**

Mouse melanoma (B16F10) and human cervical cancer (HeLa) cell lines were purchased from the Korean Cell Line Bank (Seoul, Republic of Korea). B16F10 and HeLa cells were cultured in high glucose Dulbecco's modified Eagle's medium (Welgene, Gyeongsangbuk-do, Republic of Korea) supplemented with 10% fetal bovine serum (VWR International, Radnor, PA, USA) and 1% penicillin-streptomycin from Welgene. All cultured cells were maintained at 37°C in a humidified atmosphere containing 5% CO<sub>2</sub>.

## **Two-photon fluorescence microscopy**

1 × 10<sup>5</sup> cells were seeded on 35-mm glass bottom confocal dishes (SPL Life Science, Gyeonggi-do, Republic of Korea) and allowed to stabilize for one days. When the cells reached 80% confluency, cells were treated with probe **Tyro-1** (10 μM in DMSO) at 37°C in 5% CO<sub>2</sub> for 0-3 h. For tyrosinase stimulatory effect evaluated, cells were pretreated with in absence or presence of α-MSH (200 nM) and H<sub>2</sub>O<sub>2</sub> (50 μM) for 2 h, and then incubated with probe **Tyro-1** (10 μM) at 37°C in 5% CO<sub>2</sub> for 2 h. For tyrosinase inhibitory effect evaluated, cells were pretreated with in absence or presence of kojic acid (100 μM) for 2 h, and then incubated with probe **Tyro-1** (10 μM) at 37°C in 5% CO<sub>2</sub> for 2 h. Then, cells were washed with PBS. Two-photon fluorescence microscopy images of probe labeled B16F10 cells were obtained with spectral confocal and two-photon microscopes (Leica TCS SP2) with a ×100 (NA = 1.30 OIL) objective lens. The two-photon fluorescence microscopy images were obtained with a DM IRE2 Microscope (Leica) by exciting the probes with a mode-locked titanium-sapphire laser source (Coherent Chameleon, 90 MHz, 200 fs) set at wavelength 740 nm. To obtain images at 420–520 nm range, internal PMTs were used to collect the signals in 8 bit unsigned 512 X 512 pixels at 400 Hz scan speed.

## **One-photon fluorescence microscopy**

Fluorescence images were taken using a confocal laser scanning microscope (Carl-Zeiss LSM 700 Exciter, Oberkochen, Germany) with same condition. Fluorescence channel was excited at 405 nm with a Si laser and emission was collected by a 420-500 nm band pass filter. Fluorescence images were obtained by using confocal laser scanning microscope (Carl Zeiss).

## **Cell viability**

Approximately  $2 \times 10^4$  cells were seeded on 96 well microplate (SPL Life Science) and incubated for one days. After incubation, the cells were treated with DMSO and probe **Tyro-1** for 12 h. To analyze cell viability of the probe on cells, we performed cell viability assay using CytoTox96<sup>®</sup> Non-Radioactive Cytotoxicity Assay Kit (Promega, Madison, WI, USA) followed by manufacturer's instructions. Fluorescence level was analyzed by using SPECTRA MAX GEMINI EM microplate reader (Molecular Devices, Sunnyvale, CA, USA). The wavelength was set at 490 nm. Cell viability was expressed as a percentage of absorbance measured in the treated wells relative to that in the control wells.

## **Statistical analysis**

Statistical significance of the treatment values was analyzed by comparing with control values by using Student's *t*-test. The data represent the mean  $\pm$  SE, and  $*p < 0.05$  was considered statistically significant. The *P* values of significant results are shown.

## **The Linear Range and Detection Limit**

The fluorescence titration was used to calculate the detection limit. The fluorescence emission spectrum of probe **Tyro-1** ( $2.0 \times 10^{-6}$  M) was measured ten times and the standard deviation of blank measurement was achieved. The fluorescence intensity at 452 nm was plotted as a concentration of tyrosinase. The detection limit was calculated by using following equation.

### **Detection Limit $3\sigma/k$ :**

Where  $\sigma$  is the standard deviation of blank measurement, *k* is the slope between the fluorescence intensity versus tyrosinase concentration.

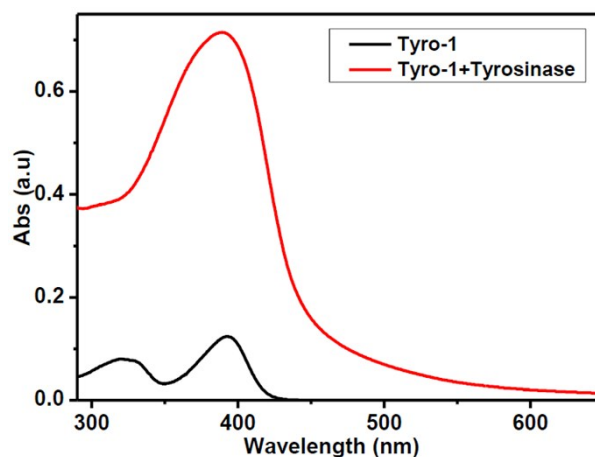

**Fig.S1** UV-Vis spectra of **Tyro-1** (5  $\mu\text{M}$ ) in the absence (Black line) and presence (Red line) of tyrosinase (200 U/mL) in PBS buffer (pH 7.4; 1% DMSO). Data were recorded after incubation at 25°C for 30 min.

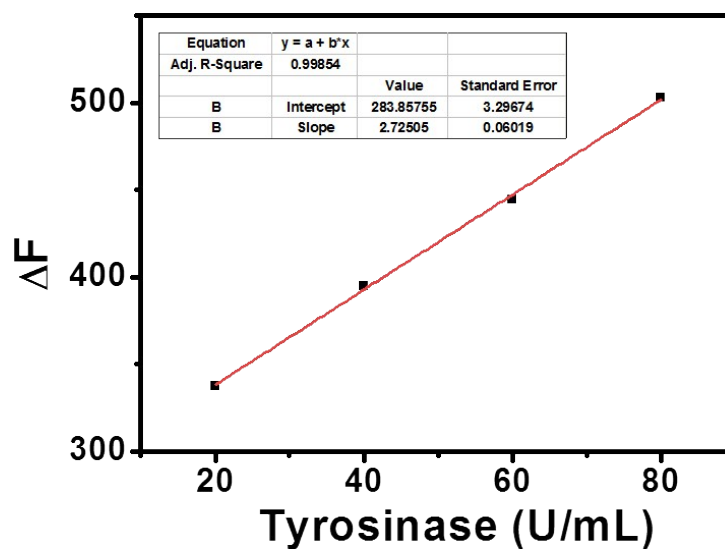

**Fig. S2** Linear correlation between  $\Delta F$  and the concentration of tyrosinase (20-80 U/mL).  $\Delta F$  means the fluorescence intensity difference of **Tyro-1** (5  $\mu\text{M}$ ) before and after incubating with tyrosinase.

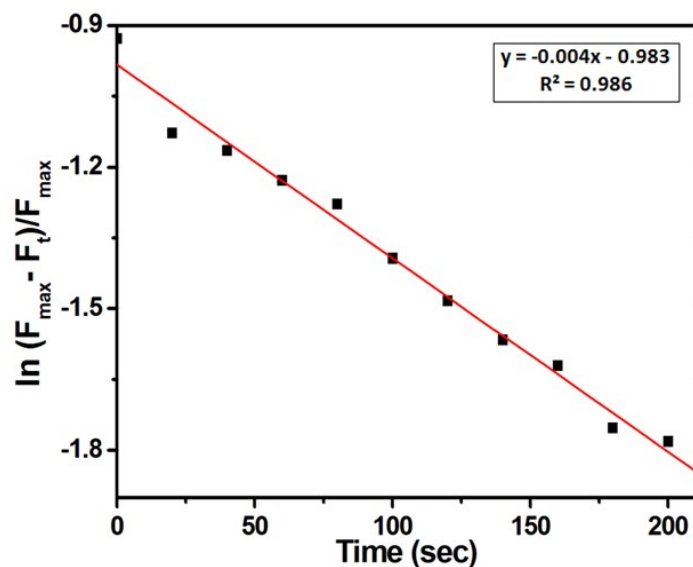

**Fig. S3** The estimation of reaction rate constant between **Tyro-1** (5  $\mu\text{M}$ ) and tyrosinase (100 U/mL) by applying regression equation;  $K = 0.004\text{S}^{-1}$

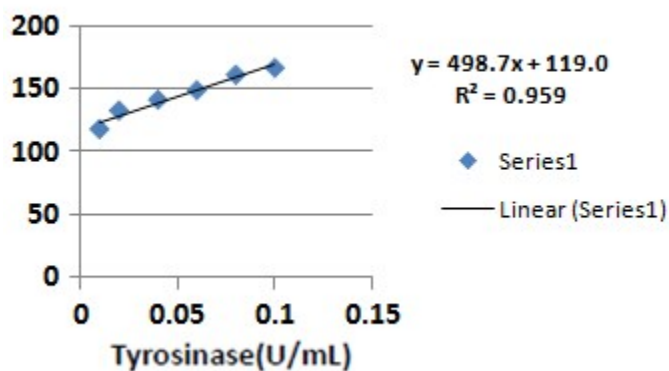

**Fig. S4** The changes in the fluorescence intensity of **Tyro-1** (5  $\mu\text{M}$ ) at 452 nm against varied concentrations of Tyrosinase (0-0.1 U/mL) in PBS buffer (pH 7.4, 1% DMSO) with the slit width 3/5 nm.

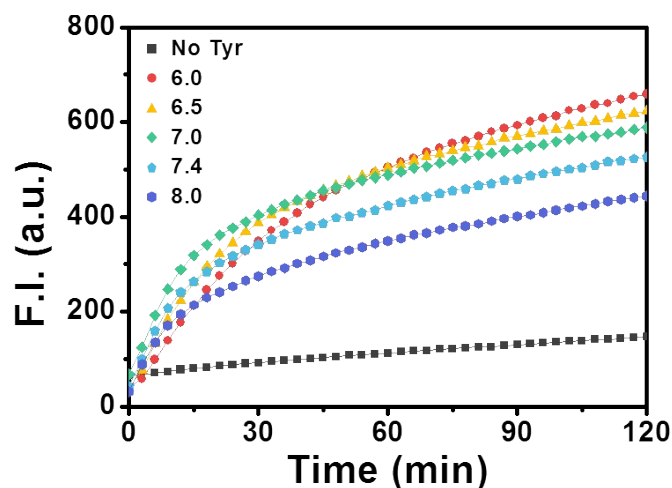

**Fig.S5** Fluorescence response of **Tyro-1** (5  $\mu$ M) upon incubation with tyrosinase (100 U/mL) in different pH buffer solutions (PBS with 1% DMSO) at 37°C, respectively. Fluorescence intensity of each point was recorded at 452 nm, excited at 400 nm with slit set at 3/5 nm.

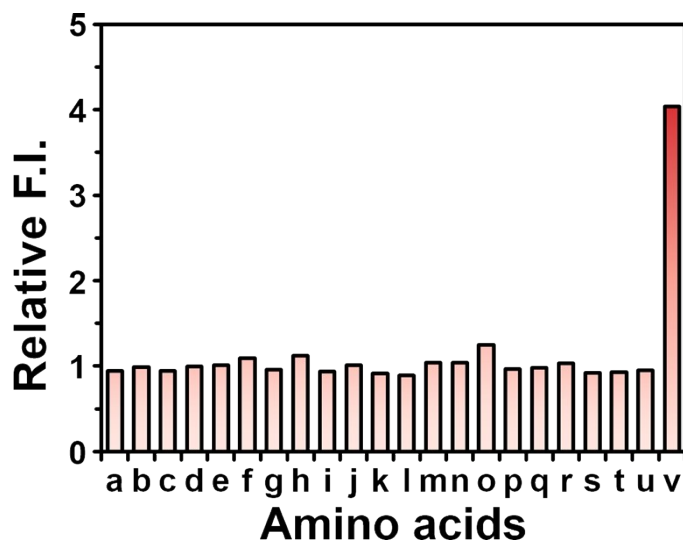

**Fig. S6** Fluorescence responses of **Tyro-1** (5  $\mu$ M) with various amino acids (500  $\mu$ M): a) alanine; b) arginine; c) asparagine; d) aspartic acid; e) cysteine; f) glutamine; g) glutamic acid; h) glycine; i) histidine; j) homocysteine; k) isoleucine; l) leucine; m) lysine; n) methionine; o) phenylalanine; p) proline; q) serine; r) threonine; s) tryptophan; t) tyrosine; u) valine and v) tyrosinase (100 U/mL) in PBS buffer (pH=7.4; 1% DMSO) at 37°C. All Fluorescence responses were recorded at 452 nm, excited at 400 nm with slit set at 3/5 nm.



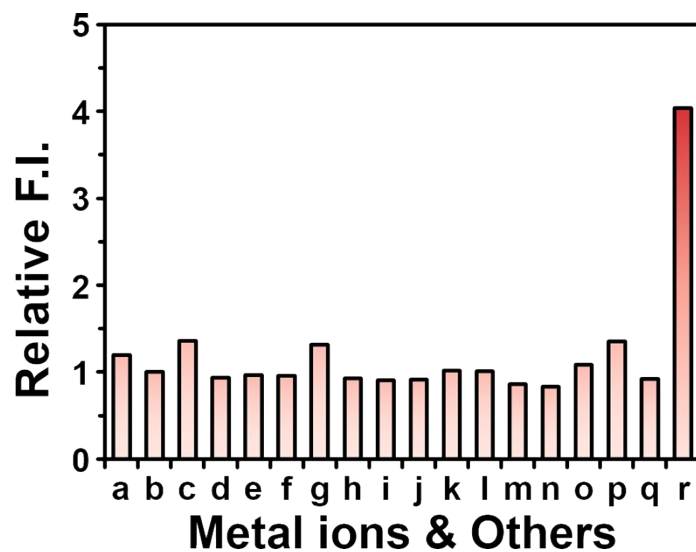

**Fig. S7** Fluorescence responses of **Tyro-1** (5  $\mu\text{M}$ ) with various metal ions (500  $\mu\text{M}$ ): a)  $\text{Ag}^+$ ; b)  $\text{Al}^{3+}$ ; c)  $\text{Ba}^{2+}$ ; d)  $\text{Ca}^{2+}$ ; e)  $\text{Cd}^{2+}$ ; f)  $\text{Co}^{2+}$ ; g)  $\text{Cu}^{2+}$ ; h)  $\text{Fe}^{2+}$ ; i)  $\text{Fe}^{3+}$ ; j)  $\text{K}^+$ ; k)  $\text{Mg}^{2+}$ ; l)  $\text{Mn}^{2+}$ ; m)  $\text{Ni}^{2+}$ ; n)  $\text{Pb}^{2+}$ ; o)  $\text{Zn}^{2+}$ ; p) ascorbic acid; q) GSH and r) tyrosinase (100 U/mL) in PBS buffer (pH=7.4; 1% DMSO) at 37°C. All Fluorescence responses were recorded at 452 nm, excited at 400 nm with slit set at 3/5 nm.

LC/MS REPORT

Acq. Method Conditions: RND X-Bridge 5.0 Min  
 COLUMN : X-BRIDGE C18 (4.6mm x 75mm) 3.5 μm  
 MOBILE PHASE A: 10mM Ammonium Acetate in water, B 100% ACN  
 Gradient : % of B 0.0/10,0.2/10,2.5/75,3.0/100,4.8/100,5.0/10  
 Column : Ambient  
 Flow rate : 2.0 ml/min

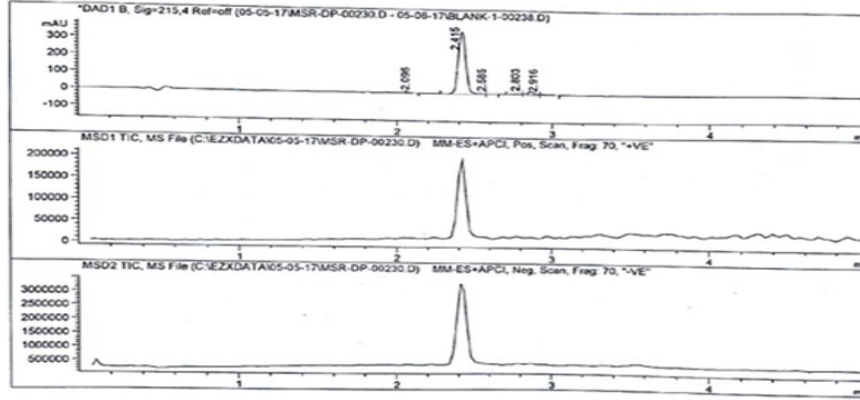

DAD1 B, Sig=215.4 Ref=->

| PEAK No | RT min | Area     | Area % |
|---------|--------|----------|--------|
| 1       | 2.096  | 3.041    | 0.231  |
| 2       | 2.415  | 1224.099 | 93.120 |
| 3       | 2.585  | 4.916    | 0.374  |
| 4       | 2.803  | 14.969   | 1.139  |
| 5       | 2.860  | 59.543   | 4.530  |
| 6       | 2.916  | 7.973    | 0.607  |

MS Spectrum

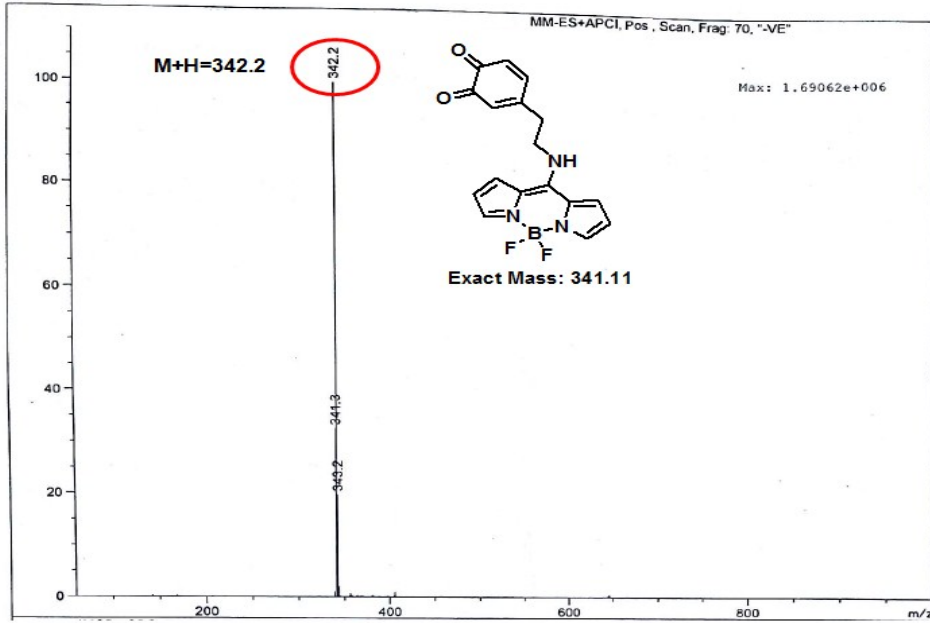

Fig. S8 LC-MS data of tyrosinase treated Tyro-1

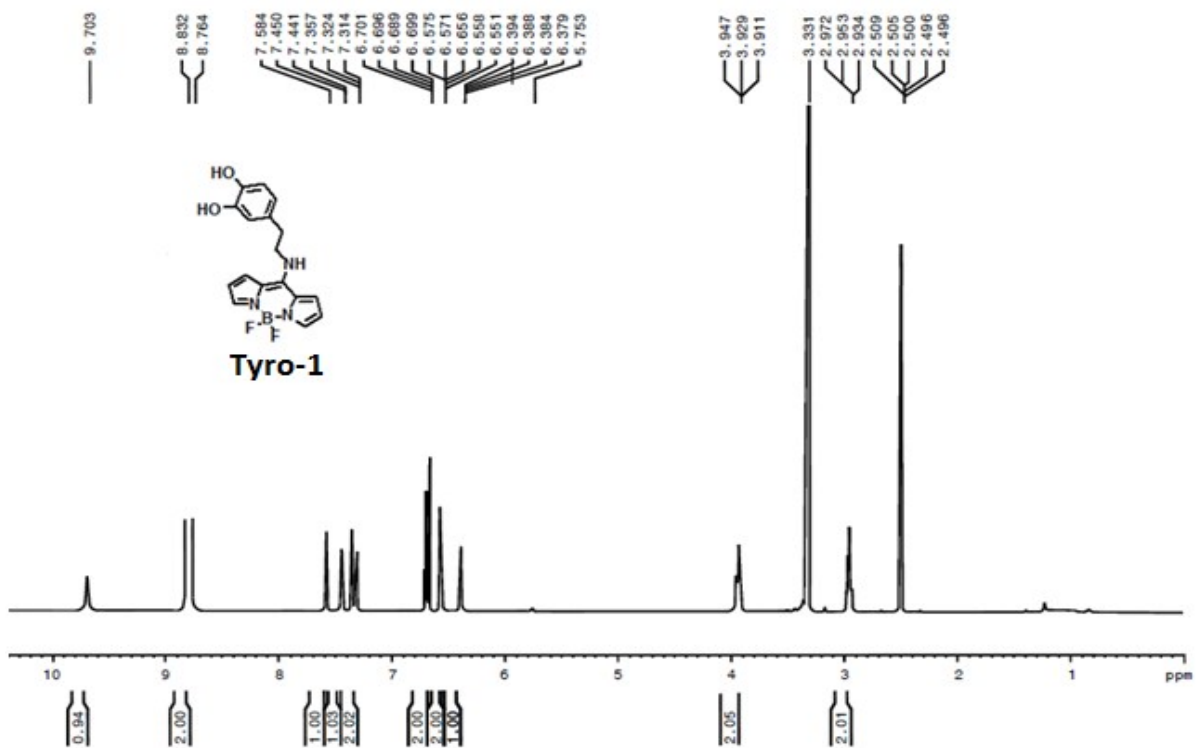

Fig.S9 <sup>1</sup>H-NMR of Tyro-1 in DMSO-d<sub>6</sub>

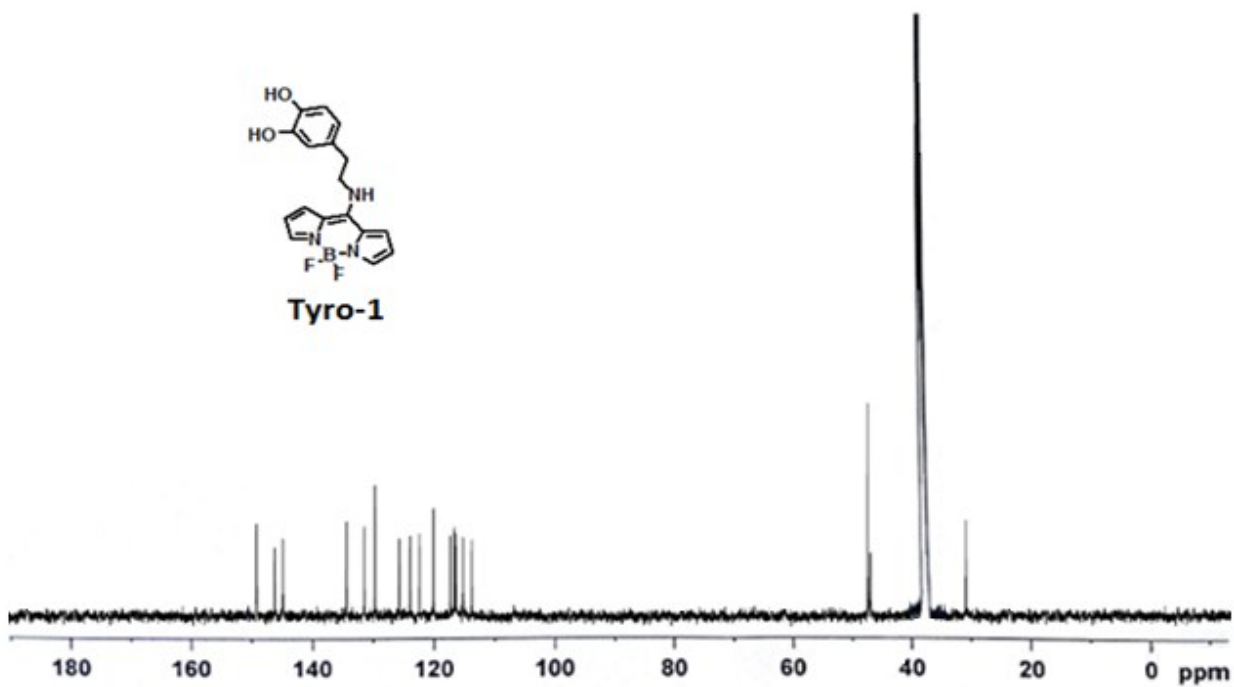

Fig.S10 <sup>13</sup>C-NMR of Tyro-1 in DMSO-d<sub>6</sub>

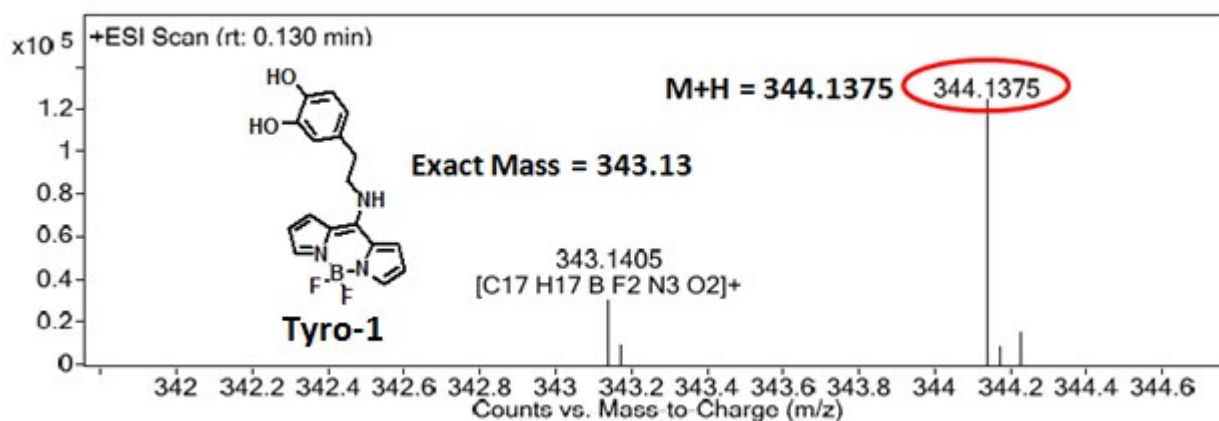

Fig.S11 HRMS of Tyro-1

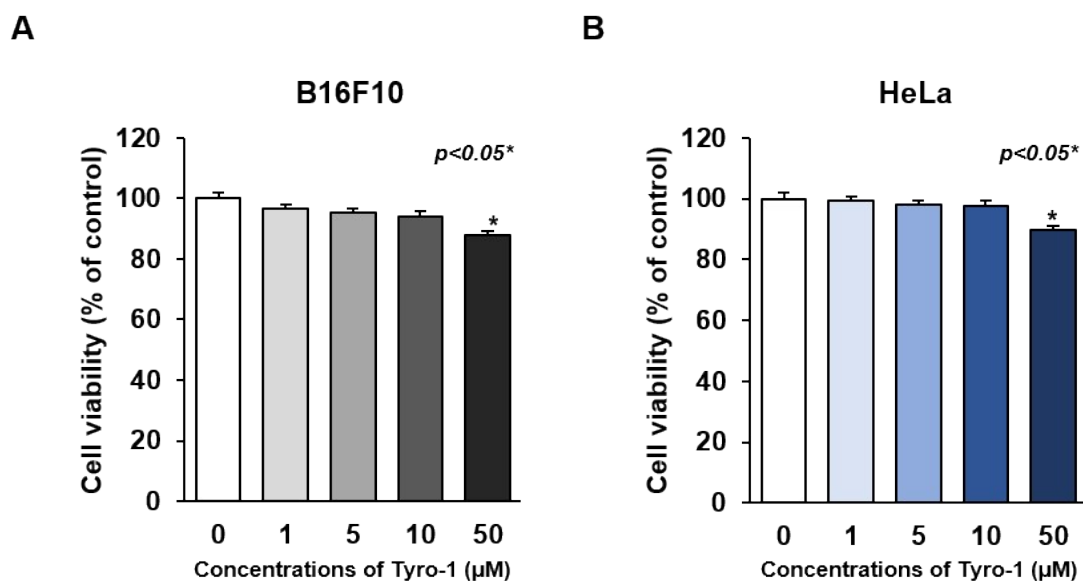

**Fig. S12** Cell viability of probe **Tyro-1**. Cells were incubated with 0, 1, 5, 10 and 50 μM of probe **Tyro-1** for 12 h in B16F10 (A) and HeLa (B) cells. Values represent mean ± SE of three independent experiments performed in triplicate; \* $p < 0.05$ .

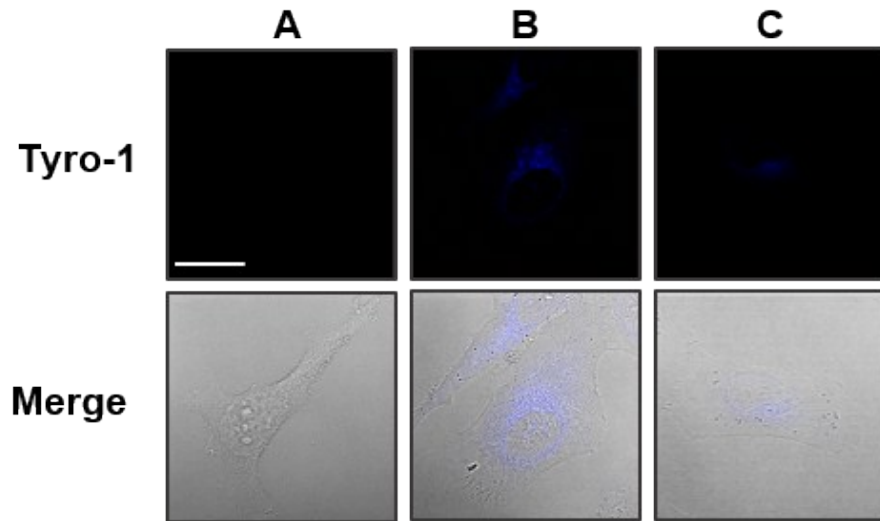

**Fig. S13** One-photon images of the various condition probe **Tyro-1** (10  $\mu\text{M}$ ) in HeLa cells. (A) control (cell only); (B) cells incubated with probe **Tyro-1** (10  $\mu\text{M}$ ) for 2h; (C) cells pretreated the kojic acid (100  $\mu\text{M}$ ) for 2 h and then incubated with probe **Tyro-1** for 2 h.  $\lambda_{ex} = 405 \text{ nm}$ ,  $\lambda_{em} = 420\text{-}500 \text{ nm}$ . Scale bar = 20  $\mu\text{M}$ .

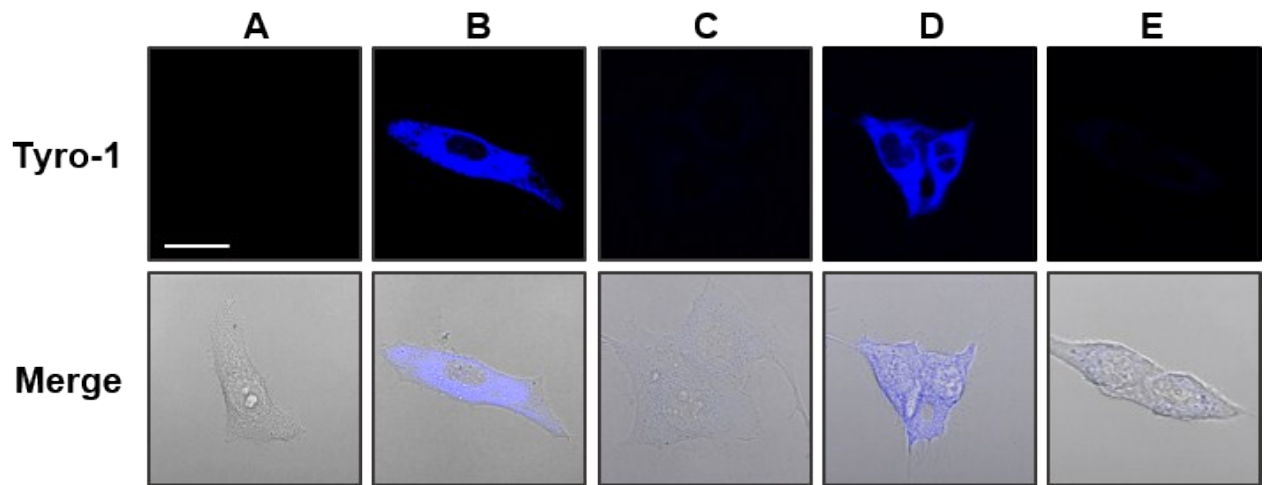

**Fig. S14** One-photon laser scanning microscopy images of the various condition probe **Tyro-1** (10  $\mu\text{M}$ ) in B16F10 cells (magnification,  $\times 40$ ). (A) Cells only (control); (B) cells incubated with probe **Tyro-1** (10  $\mu\text{M}$ ) for 2h; (C) Cells pretreated the kojic acid (100  $\mu\text{M}$ ) for 2 h and then incubated with probe **Tyro-1** for 2 h; (D) Cells pretreated the  $\alpha\text{-MSH}$  (200 nM) for 2 h and then incubated with probe **Tyro-1** for 2 h; (E) Cells pretreated the  $\alpha\text{-MSH}$  (200 nM) and kojic acid for 2 h and then incubated with probe **Tyro-1** for 2 h.  $\lambda_{ex} = 405 \text{ nm}$ ,  $\lambda_{em} = 420\text{-}500 \text{ nm}$ . Scale bar = 20  $\mu\text{M}$ .

## References

1. Y. Zhang, X. Shao, Y. Wang, F. Pan, R. Kang, F. Peng, Z. Huang, W. Zhang and W. Zhao *Chem. Commun.*, 2015, **51**, 4245-4548.
2. G. W. Chen, F. L. Song, J. Y. Wang, Z. G. Yang, S. G. Sun, J. L. Fan, X. X. Qiang, X. Wang, B. R. Dou and X. J. Peng, *Chem. Commun.*, 2012, **48**, 2949-2951.
